# Supplementary material for: Recovery of Metals from Electronic Waste-Printed Circuit Boards by Ionic Liquids, DESs and Organophosphorous-Based Acid Extraction
Source: MDPI journal article supplement (doi:10.3390/molecules27154984), 2022-08-05
Supplement: s1 [file s1]

## Supplementary Material

# Recovery of metals from electronic waste - printed circuit boards by ionic liquids, DESs and organophosphorous-based acid extraction

Aneta Łukomska<sup>1</sup>, Anna Wiśniewska<sup>1</sup>, Zbigniew Dąbrowski<sup>1</sup>, Jakub Lach<sup>1</sup>, Kamil Wróbel<sup>1</sup>,  
Dorota Kolasa<sup>1</sup>, Urszula Domańska<sup>1,\*</sup>

<sup>1</sup>ŁUKASIEWICZ Research Network – Industrial Chemistry Institute,  
Rydygiera 8, 01-793 Warsaw, Poland.

## S1. SYNTHESIS OF NEW BI-FUNCTIONAL IONIC LIQUIDS

### S1.1. The synthesis of didecyldimethylammonium salicylate ( $[N_{10,10,1,1}][Sal]$ , $C_{29}H_{53}NO_3$ )

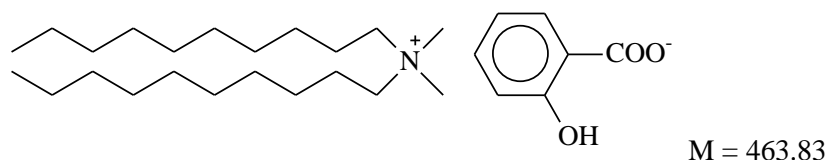

Salicylic acid (13.81 g, 0.1 mol) and water (65 cm<sup>3</sup>) were placed in a 500 cm<sup>3</sup> round bottom flask equipped with a magnetic stirrer, cooler condenser and thermometer. To the obtained suspension 5.61 g (0.1 mol) of potassium hydroxide dissolved in water (30 cm<sup>3</sup>) was added. The mixture was stirred at  $T = 343$  K for 2 h until salicylic acid was completely dissolved /until the complete dissolution of the salicylic acid. Next, 72.44 g of a 50 % aqueous solution of didecyldimethylammonium chloride (36.22 g, 0.1 mol of  $[N_{10,10,1,1}][Cl]$ ) was added. There was immediate cloudiness upon the addition of the didecyldimethylammonium chloride solution. The mixture was stirred at  $T = 333$  K for 6 h, then cooled to  $T = 298$  K and 100 cm<sup>3</sup> of dichloromethane was added. Two phases were separated. The organic layer containing the desired product was washed 2 times ( $2 \times 50$  cm<sup>3</sup>) with water to remove the potassium chloride. The solvent was removed by distillation under reduced pressure. The residue was dried at 1.3 hPa (333 K, 10 h). 43.40 g (0.094 mol) of didecyldimethylammonium salicylate was obtained in the solid phase. Yield 94.0 %.

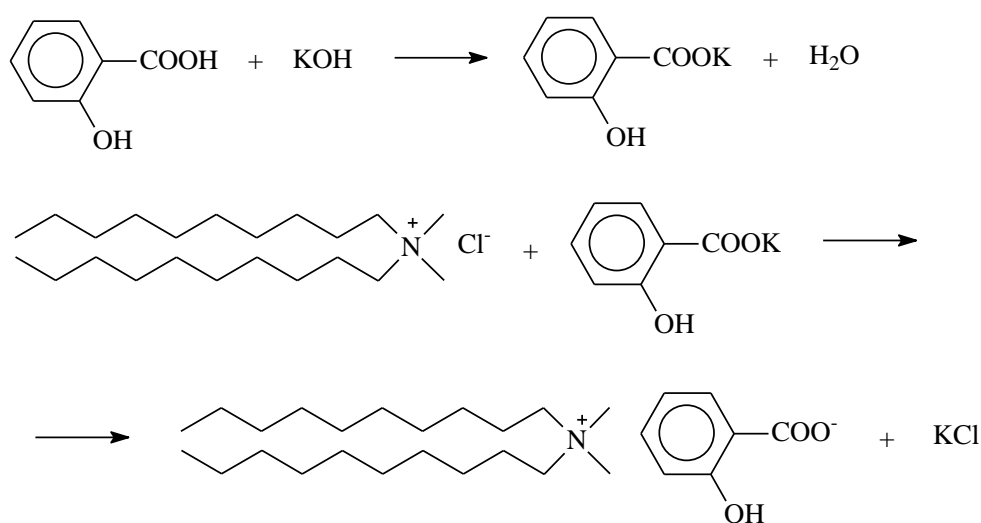

<sup>1</sup>H NMR (CDCl<sub>3</sub>, 500 MHz),  $\delta$ : 0.83 (t, 6H,  $2 \times CH_3$ ,  $J = 5.0$  Hz), 1.12-1.27 (m, 28H,  $14 \times CH_2$ ), 1.48-1.56 (m, 4H,  $2 \times CH_2$ ), 3.11 (s, 6H,  $2 \times CH_3[N^+]$ ), 3.18-3.21 (m, 4H,  $2 \times CH_2[N^+]$ ), 6.69 (dt, 1H, Ar,  $J_1$

= 7.5 Hz,  $J_2 = 1.0$  Hz), 6.77 (dd, 1H, Ar,  $J_1 = 10.0$  Hz,  $J_2 = 2.5$  Hz), 7.20 (dt, 1H, Ar,  $J_1 = 7.5$  Hz,  $J_2 = 1.0$  Hz), 7.85 (dd, 1H, Ar,  $J_1 = 10.0$  Hz,  $J_2 = 2.5$  Hz), 10.49 (s, 1H, ArOH) ppm.

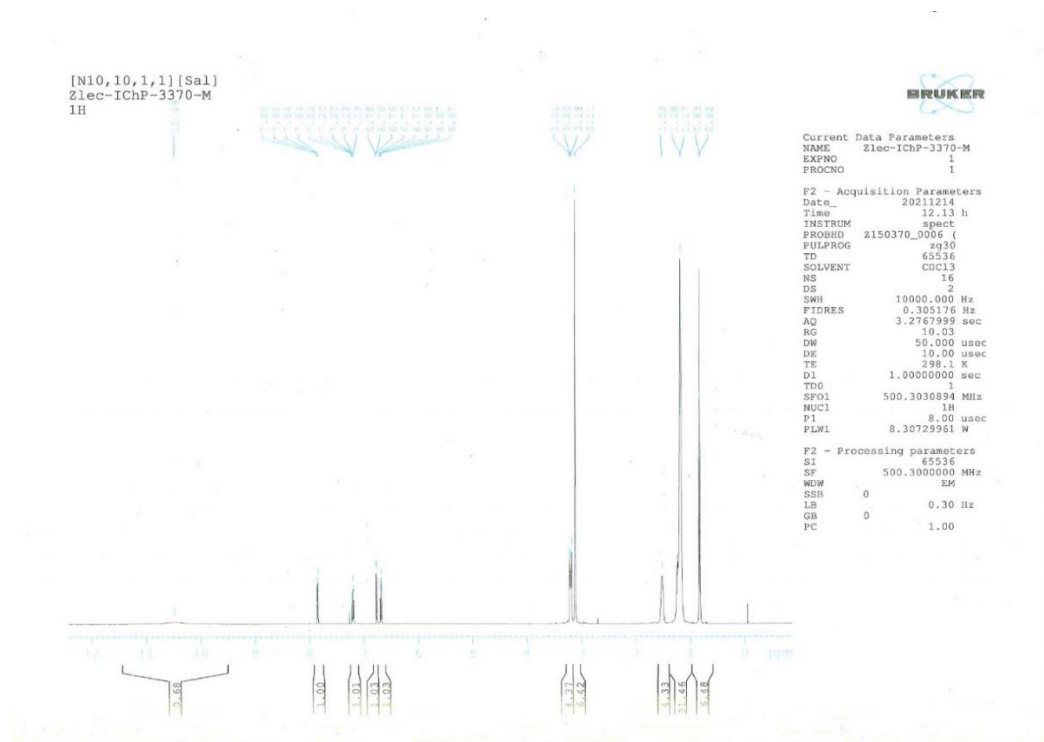

$^{13}\text{C}$  NMR ( $\text{CDCl}_3$ , 125.8 MHz),  $\delta$ : 14.06 ( $2 \times \text{CH}_3$ ), 22.60 ( $2 \times \text{CH}_2$ ), 22.62 ( $2 \times \text{CH}_2$ ), 26.12 ( $2 \times \text{CH}_2$ ), 29.06 ( $2 \times \text{CH}_2$ ), 29.18 ( $2 \times \text{CH}_2$ ), 29.29 ( $2 \times \text{CH}_2$ ), 29.34 ( $2 \times \text{CH}_2$ ), 31.78 ( $2 \times \text{CH}_2$ ), 50.91 ( $2 \times \text{CH}_3[\text{N}^+]$ ), 63.92 ( $2 \times \text{CH}_2[\text{N}^+]$ ), 116.41 (CH, Ar), 117.55 (CH, Ar), 118.69 (C, Ar), 130.54 (CH, Ar), 132.75 (CH, Ar), 162.13 (C, Ar-OH), 173.65 ( $[\text{C}=\text{O}]\text{O}^-$ ) ppm.

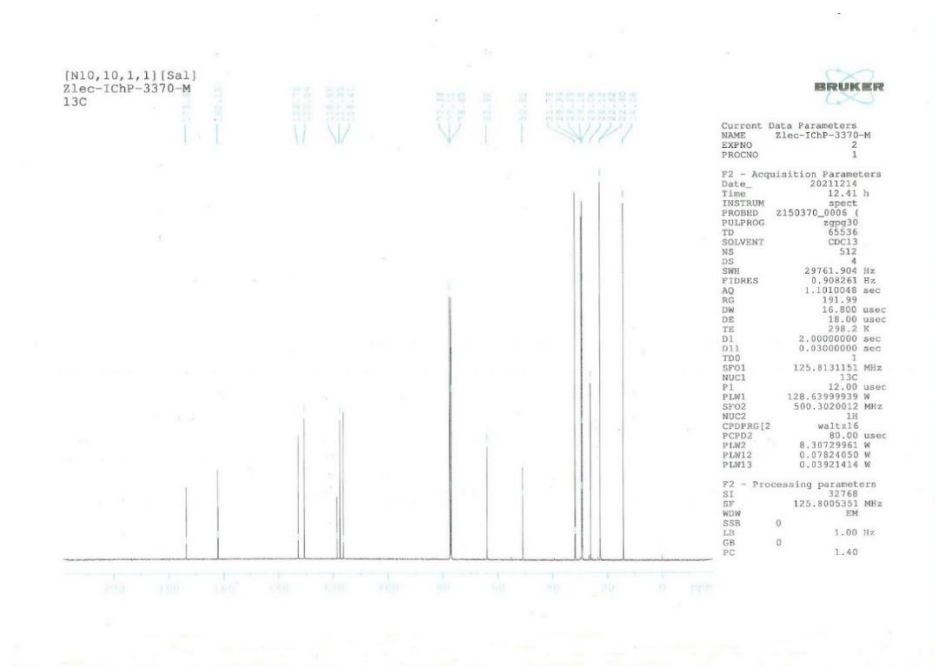

**S1.2. The synthesis of didecyldimethylammonium bis(2-ethylhexyl)phosphate ([N<sub>10,10,1,1</sub>][D2EHPA], C<sub>38</sub>H<sub>82</sub>NO<sub>4</sub>P)**

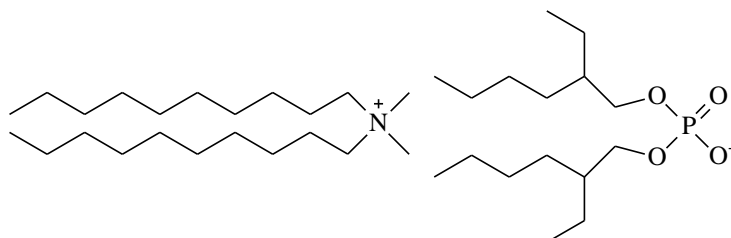

M = 648.13

32.24 g (0.1 mol) of bis(2-ethylhexyl)phosphoric acid were placed in a 500 cm<sup>3</sup> round bottom flask equipped with a magnetic stirrer, cooler condenser and thermometer. Next, the solution of potassium hydroxide (5.61 g, 0.1 mol) in water (50 cm<sup>3</sup>) was added. The thick and glassy mixture was stirred magnetically at  $T = 343$  K for 2 h. Next, 72.44 g of a 50% aqueous solution of didecyldimethylammonium chloride (36.22 g, 0.1 mol of [N<sub>10,10,1,1</sub>][Cl]) was added. The mixture was stirred at  $T = 338$  K for 6 h, then cooled to  $T = 298$  K and 100 cm<sup>3</sup> of dichloromethane were added. Two phases were separated. The organic layer containing the desired product was washed 2 times ( $2 \times 50$  cm<sup>3</sup>) with water to remove the potassium chloride. The solvent was removed by distillation under reduced pressure. The residue was dried at 1.3 hPa (333 K, 10 h). 62.39 g (0.096 mol) of didecyldimethylammonium bis(2-ethylhexyl)phosphate was obtained in the form of a clear thick liquid. Yield 96.0%.

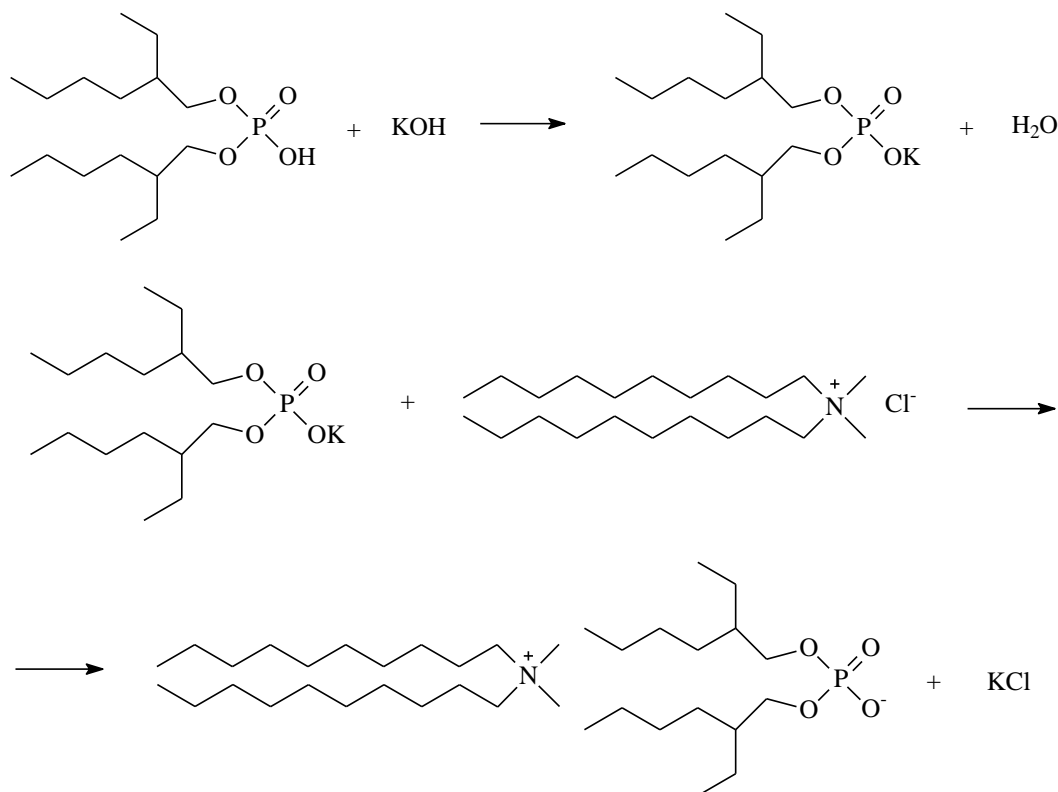

$^1\text{H}$  NMR ( $\text{CDCl}_3$ , 500 MHz),  $\delta$ : 0.77-0.81 (m, 18H,  $6 \times \text{CH}_3$ ), 1.13-1.28 (m, 42H), 1.33-1.39 (m, 2H), 1.41-1.46 (m, 2H), 1.56-1.62 (m, 4H,  $2 \times \text{CH}_2$ ), 3.26 (s, 6H,  $2 \times \text{CH}_3[\text{N}^+]$ ), 3.32-3.35 (m, 4H,  $2 \times \text{CH}_2[\text{N}^+]$ ), 3.61-3.69 (m, 4H,  $2 \times \text{CH}_2\text{O}$ ) ppm.

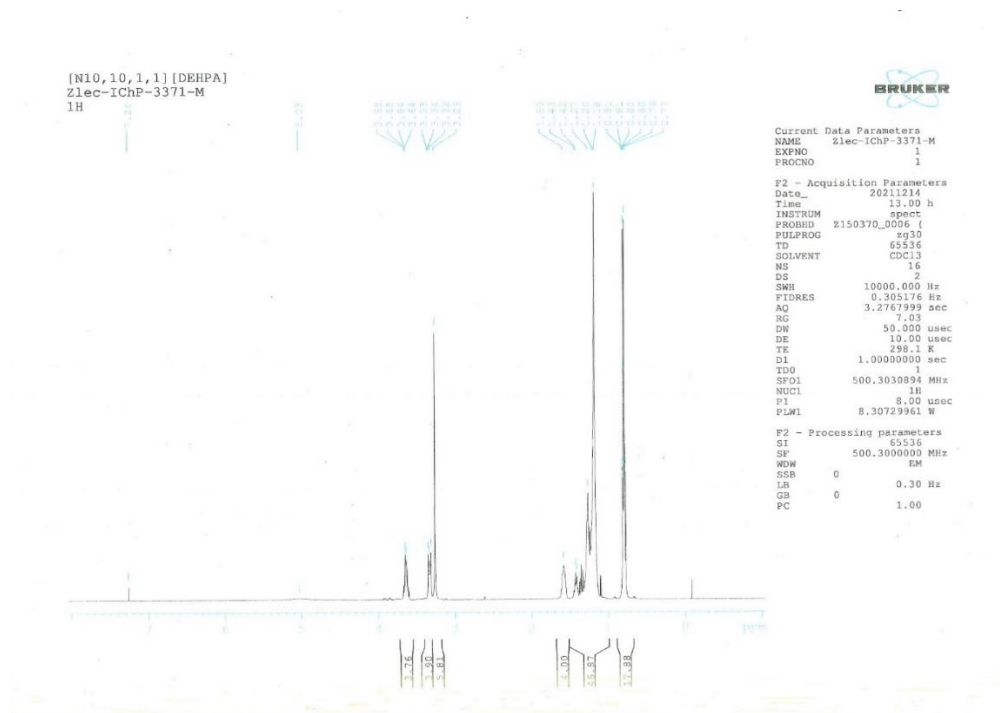

$^{13}\text{C}$  NMR ( $\text{CDCl}_3$ , 125.8 MHz),  $\delta$ : 10.83 ( $2 \times \text{CH}_3$ ), 13.99 ( $2 \times \text{CH}_3$ ), 14.05 ( $2 \times \text{CH}_3$ ), 22.56 ( $2 \times \text{CH}_2$ ), 22.68 ( $2 \times \text{CH}_2$ ), 23.08 ( $2 \times \text{CH}_2$ ), 23.26 ( $2 \times \text{CH}_2$ ), 26.25 ( $2 \times \text{CH}_2$ ), 28.99 ( $2 \times \text{CH}_2$ ), 29.17 ( $2 \times \text{CH}_2$ ), 29.20 ( $2 \times \text{CH}_2$ ), 29.34 ( $2 \times \text{CH}_2$ ), 29.37 ( $2 \times \text{CH}_2$ ), 30.04 ( $2 \times \text{CH}_2$ ), 31.75 ( $2 \times \text{CH}_2$ ), 40.29 (CH), 40.35 (CH), 51.14 ( $2 \times \text{CH}_3[\text{N}^+]$ ), 63.21 ( $2 \times \text{CH}_2[\text{N}^+]$ ), 67.55 ( $\text{CH}_2\text{O}$ ), 67.55 ( $\text{CH}_2\text{O}$ ) ppm

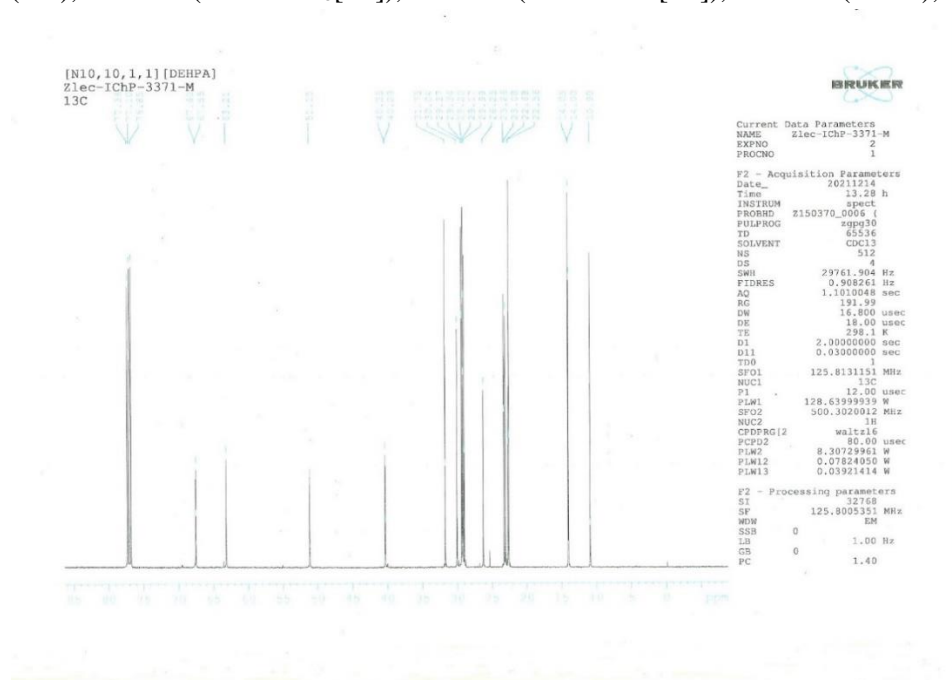

**S1.3. The synthesis of didecyldimethylammonium bis(2-2,4,4-trimethylpentyl)phosphinate ([N<sub>10,10,1,1</sub>][Cyanex272], C<sub>38</sub>H<sub>82</sub>NO<sub>2</sub>P)**

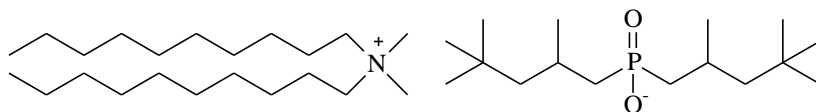

$$M = 616.12$$

16.13 g (0.05 mol) of bis(2,4,4-trimethylpentyl)phosphinic acid (Cyanex 272, 90%) and a solution of potassium hydroxide (2.80g, 0.05 mol) in water (30 cm<sup>3</sup>) was placed in a 250 cm<sup>3</sup> round bottom flask equipped with a magnetic stirrer, cooler condenser, and thermometer. The mixture was stirred at  $T = 338$  K for 3 h. Next, 36.22 g of a 50% aqueous solution of didecyldimethylammonium chloride (18.11 g, 0.05 mol of [N<sub>10,10,1,1</sub>][Cl]) was added. The cloudiness occurred after the addition of the ammonium chloride solution. The mixture was stirred at  $T = 338$  K for 6 h. After cooling the mixture, dichloromethane (60 cm<sup>3</sup>) was added and 2 phases were separated. The organic phase containing the ionic liquid was washed 2 times with water (2 × 30 cm<sup>3</sup>). The solvent was removed by distillation under pressure and the residue was dried at 1.3 hPa for 10 h (333 K). 31.68 g (0.0495 mol) of didecyldimethylammonium bis(2-2,4,4-trimethylpentyl)phosphinate were obtained in the form of a clear, thick liquid. Yield 99%.

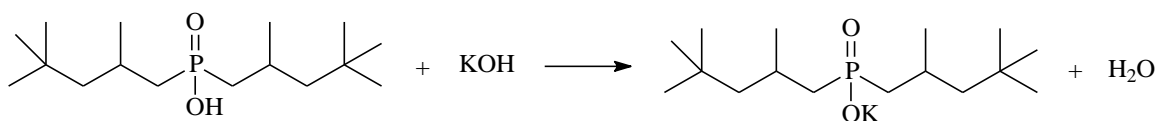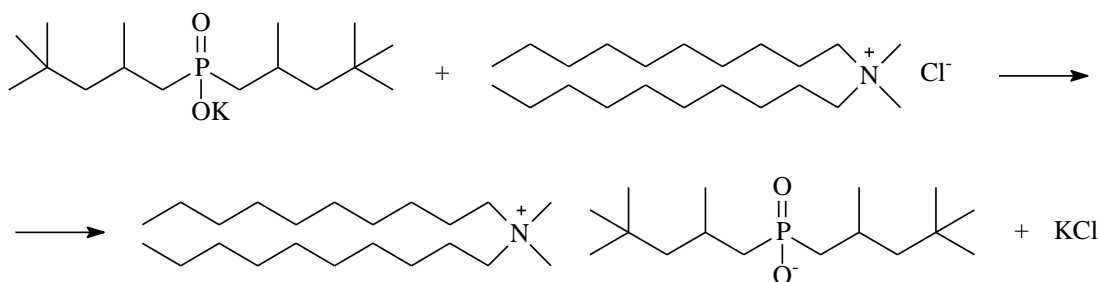

<sup>1</sup>H NMR (CDCl<sub>3</sub>, 500 MHz),  $\delta$ : 0.77-0.84 (m, 24 H, 8 × CH<sub>3</sub>), 1.00-1.04 (m, 8H), 1.13-1.30 (m, 32H, 16 × CH<sub>2</sub>), 1.45-1.52 (m, 2H), 1.54-1.60 (m, 4H), 1.88-1.93 (m, 2H), 3.28 (s, 6H, 2 × CH<sub>3</sub>[N<sup>+</sup>]), 3.34-3.37 m, 4H, 2 × CH<sub>2</sub>[N<sup>+</sup>] ppm.
